# Supplementary figures and images for: Disparities in access to fertility care: who’s in and who’s out
Source: PubMed Central journal article supplement — F S Rep. 2020 Nov 18;2(1):109–17. doi: 10.1016/j.xfre.2020.11.001 (PMC8244333; doi:10.1016/j.xfre.2020.11.001), 2020-11-18

Wisconsin

Illinois

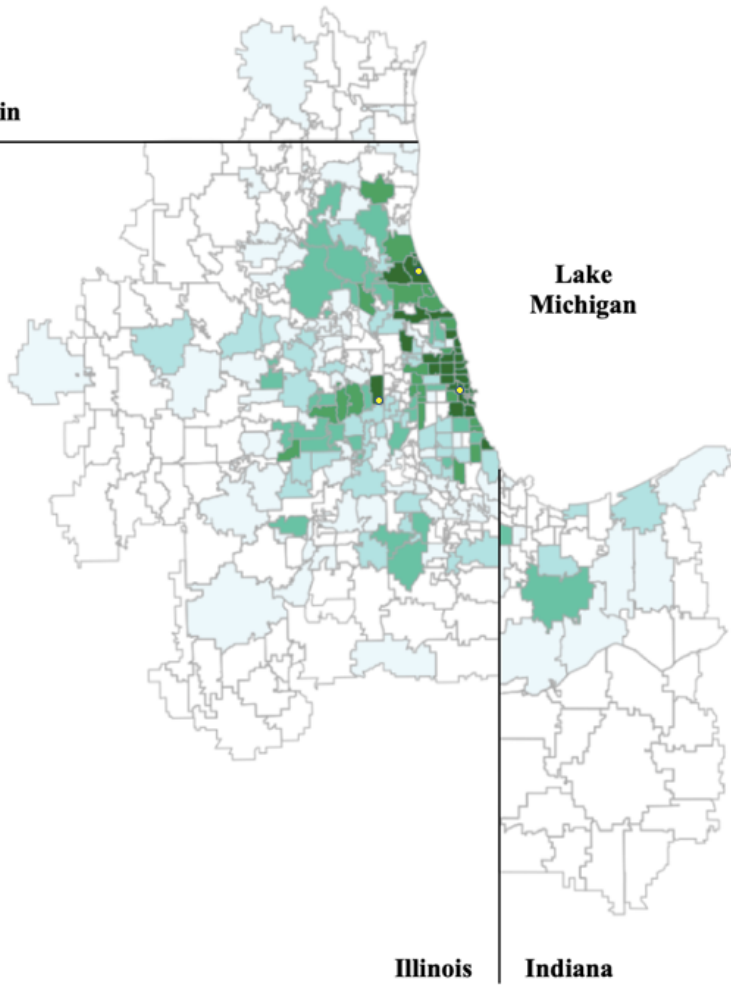

Number of Respondents  
Per Zip Code

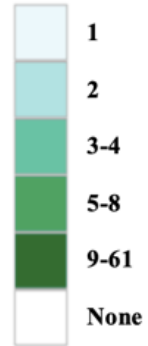

● Fertility Clinic Locations

Supplement: mmc1.pdf [file mmc1.pdf]
